# Supplementary material
Source: publisher site journal article supplement (https://www.dovepress.com/article/315488)
Supplement: Supplementary file 1 [file get_supplementary_file.php]

**Supplemental Information**

**Understanding competitive endogenous RNA Network mechanism in Type 1 Diabetes Mellitus using computational and bioinformatics approaches**

**Xuanzi Yi, Xu Cheng**

**Supplementary Figure 1.** Identification of candidate reference genes using geNorm and Normfinder.

**Supplementary File 1.** The R code for differential expression analysis.

**Supplementary File 2.** The R code for enrichment analysis.

**Supplementary File 3.** The R code for co-expression analysis**.**

**Supplementary Figure 1**


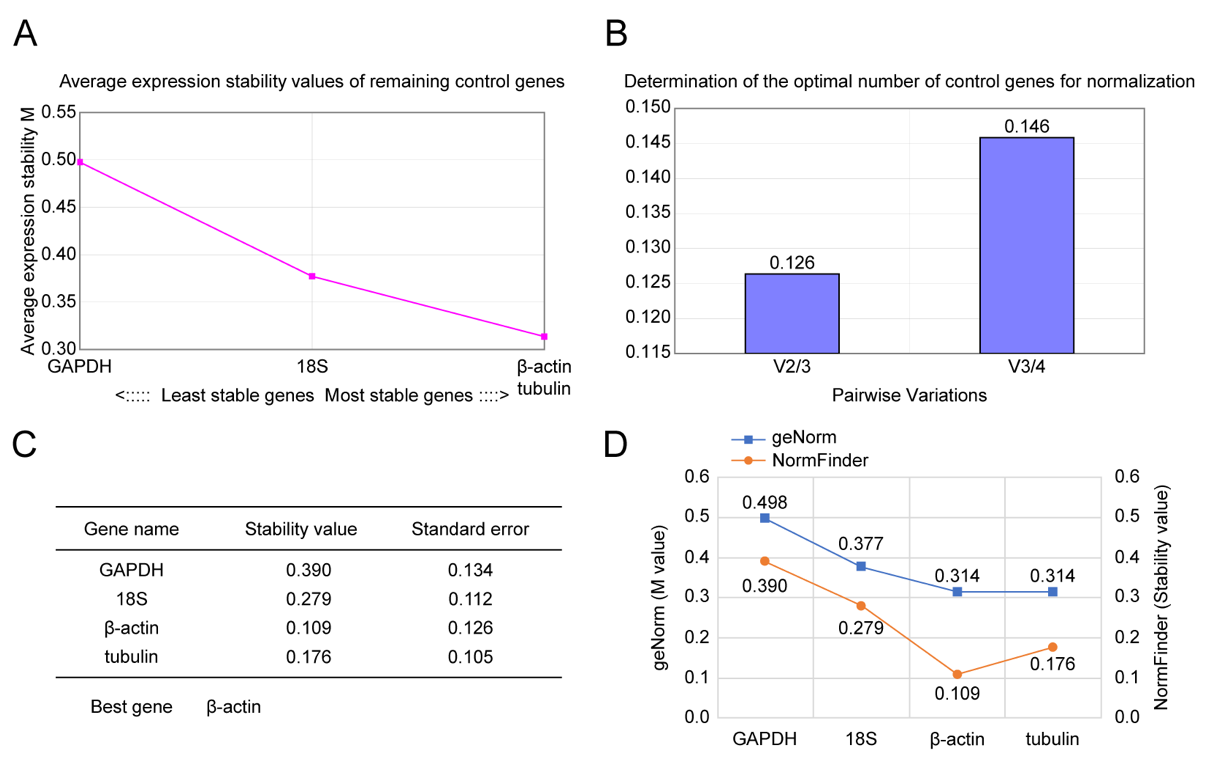


Identification of candidate reference genes using geNorm and Normfinder. **(A)** The stability M values of candidate genes by geNorm (Ver. 3.5). **(B)** The pairwise variations (Vn/Vn+1) of candidate genes by geNorm. **(C)** The stability value of candidate genes by NormFinder. **(D)** A combination of the stability values provided by geNorm and Normfinder.

**Supplementary File 1**

**The R code for differential expression analysis**

# set the working directory and import the data

setwd("/Users/admin/Desktop/GSE133225/diff circ/")

library(impute)

library("wateRmelon")

library(limma)

library(pheatmap)

probe_exp<-read.table("microarray.txt",header=T,sep="\t",row.names=1)

mat=as.matrix(probe_exp)

mat=impute.knn(mat)

matData=mat$data

# data normalization

matData=matData[rowMeans(matData)>0.005,]

pdf(file="rawBox.pdf")

boxplot(matData,col = "blue",xaxt = "n",outline = F)

dev.off()

matData = betaqn(matData)

pdf(file="normalBox.pdf")

boxplot(matData,col = "red",xaxt = "n",outline = F)

dev.off()

write.table(matData,file="norm.txt",sep="\t",quote=F)

# if needed, open the norm.txt file in Excel and do logarithmic processing

# gene expression analysis

eset<-read.table("norm.txt",sep='\t',header=T,row.names=1)

condition=factor(c(rep("normal",4),rep("T1DM",4)))

design<-model.matrix(~-1+condition)

colnames(design)<-c("normal","T1DM")

contranst.matrix<-makeContrasts(contrasts="T1DM-normal",levels=design)

fit<-lmFit(eset,design)

fit1<-contrasts.fit(fit,contranst.matrix)

fit2<-eBayes(fit1)

dif<-topTable(fit2,coef="T1DM-normal",n=nrow(fit2),adjust="BH")

genesymbol<-rownames(dif)

dif<-cbind(genesymbol,dif)

write.table(dif,file="all.circRNA.Foldchange.txt",sep='\t',quote=F,row.names=F)

# volcano plot

pdf(file="Volcano.pdf")

yMax=max(-log10(dif$P.Value))

xMax=max(abs(dif$logFC))

plot(dif$logFC,-log10(dif$P.Value), xlab="log2(FC)",ylab="-log10(P.Value)",main="Volcano", xlim=c(-xMax,xMax),ylim=c(0,yMax),yaxs="i",pch=20, cex=0.4,col="grey")

diffSub1=subset(dif, dif$P.Value<0.05 & dif$logFC>1)

diffSub2=subset(dif, dif$P.Value<0.05 & dif$logFC<(-1))

points(diffSub1$logFC,-log10(diffSub1$P.Value), pch=20, col="red",cex=0.4)

points(diffSub2$logFC,-log10(diffSub2$P.Value), pch=20, col="green",cex=0.4)

cut = -log10(0.05)

abline(h=cut,lty=2,lwd=1,col="blue")

abline(v=c(-log2(2),log2(2)),lty=2,lwd=1,col="blue")

dev.off()

#output the fold change of genes

dif2<-topTable(fit2,coef="T1DM-normal",n=nrow(fit2),lfc=log2(2),adjust="BH")

dif2<-dif2[dif2[,"P.Value"]<0.05,]

genesymbol<-rownames(dif2)

dif2<-cbind(genesymbol,dif2)

dif2<-dif2[order(dif2$logFC),]

write.table(dif2,file="diff.circRNA.FDR0.05.txt",sep='\t',quote=F,row.names=F)

dif2$genesymbol<-rownames(dif2)

loc<-match(dif2$genesymbol,rownames(eset))

DEG_exp<-eset[loc,]

genesymbol<-rownames(DEG_exp)

DEG_exp<-cbind(genesymbol,DEG_exp)

write.table(DEG_exp,file="circRNA.FDR0.05.exprs.txt",sep='\t',quote=F,row.names=F)

# heat map

pdf(file="pheatmap.pdf",width=20,height=10)

designNC = c( rep("normal",4), rep("T1DM",4))

group_info <- data.frame(row.names=names(DEG_exp),groups=designNC)

pheatmap(DEG_exp,color=colorRampPalette(c("green","black","red"))(100),fontsize_row=10,fontsize_col=10,scale="row",border_color=NA,cluster_col = FALSE,annotation_col=group_info)

dev.off()

**Supplementary File 2**

**The R code for enrichment analysis**

# set the working directory and import the data

library(clusterProfiler)

setwd("/Users/admin/Desktop/GSE133225/diff circ/KEGG enrich analysis")

rt = read.table('list.txt',header = T,sep = '\t')

x = rt$Gene.Name

# ID to genesymbol

eg <- bitr(x,

fromType="SYMBOL",

toType=c("ENTREZID","ENSEMBL",'SYMBOL'),

OrgDb="org.Hs.eg.db")

head(eg)

# KEGG enrichment analysis

kegg <- enrichKEGG(eg$ENTREZID,

organism = 'hsa',

keyType = 'kegg',

pvalueCutoff = 0.05,

pAdjustMethod = 'BH',

qvalueCutoff = 0.05,

use_internal_data = FALSE)

KEGG.result <- as.data.frame(kegg)

# GO enrichment analysis

go_MF <- enrichGO(eg$ENTREZID,

OrgDb = org.Hs.eg.db,

ont='MF',

pAdjustMethod = 'BH',

pvalueCutoff = 0.05,

qvalueCutoff = 0.05,

keyType = 'ENTREZID',

readable=TRUE)

go_result_MF <- as.data.frame(go_MF)[1:6, ]

go_CC <- enrichGO(eg$ENTREZID,

OrgDb = org.Hs.eg.db,

ont='CC',

pAdjustMethod = 'BH',

pvalueCutoff = 0.05,

qvalueCutoff = 0.05,

keyType = 'ENTREZID',

readable=TRUE )

go_result_CC <- as.data.frame(go_CC)[1:23, ]

go_BP <- enrichGO(eg$ENTREZID,

OrgDb = org.Hs.eg.db,

ont='BP',

pAdjustMethod = 'BH',

pvalueCutoff = 0.05,

qvalueCutoff = 0.05,

keyType = 'ENTREZID',

readable=TRUE)

go_result_BP <- as.data.frame(go_BP)[1:8, ]

go_enrich_df <- data.frame(ID=c(go_result_BP$ID, go_result_CC$ID, go_result_MF$ID), Description=c(go_result_BP$Description, go_result_CC$Description, go_result_MF$Description), GeneNumber=c(go_result_BP$Count, go_result_CC$Count, go_result_MF$Count), type=factor(c(rep("biological process", 8), rep("cellular component", 23),rep("molecular function", 6)), levels=c("molecular function", "cellular component", "biological process")))

# visualization

pdf("KEGG.pdf")

dotplot(kegg, showCategory=20)

barplot(kegg,showCategory=20,drop=T)

cnetplot(kegg, foldChange=geneList)

dev.off()

go_enrich_df$number <- factor(rev(1:nrow(go_enrich_df)))

shorten_names <- function(x, n_word=4, n_char=40){

if (length(strsplit(x, " ")[[1]]) > n_word || (nchar(x) > 40))

{

if (nchar(x) > 40) x <- substr(x, 1, 40)

x <- paste(paste(strsplit(x, " ")[[1]][1:min(length(strsplit(x," ")[[1]]), n_word)],

collapse=" "), "...", sep="")

return(x)

}

else

{

return(x)

}

}

labels=(sapply(

levels(go_enrich_df$Description)[as.numeric(go_enrich_df$Description)],

shorten_names))

names(labels) = rev(1:nrow(go_enrich_df))

CPCOLS <- c("#8DA1CB", "#FD8D62", "#66C3A5")

library(ggplot2)

p <- ggplot(data=go_enrich_df, aes(x=number, y=GeneNumber, fill=type)) +

geom_bar(stat="identity", width=0.8) + coord_flip() +

scale_fill_manual(values = CPCOLS) + theme_bw() +

scale_x_discrete(labels=labels) +

xlab("GO term") +

theme(axis.text=element_text(face = "bold", color="gray50")) +

labs(title = "The Most Enriched GO Terms")

showCategory=20

pdf("go_enrichment.pdf")

p

dev.off()

**Supplementary File 3**

**The R code for co-expression analysis**

# set the working directory and the parameters

library(psych)

setwd("/Users/admin/Desktop/ GSE133225/diff circ/coexpression")

cutoff <- 0.7

pthreshold <- 0.05

# read the circRNA expression data

circRNA.sig <- read.table("diff.circRNA.FDR0.05.txt",header=T,sep="\t",row.names=1)

circRNA.expall <- read.table("circRNA.FDR0.05.exprs.txt",header=T,sep="\t", row.names=1)

cross1 <- intersect(row.names(circRNA.sig),rownames(circRNA.expall))

circRNA.top <- data.frame(row.names=as.character(cross1),circRNA.expall[cross1,])

# read mRNA expression data

mRNA.sig <- read.table("diff.mRNA.FDR0.05.txt",header=T,sep="\t", row.names=1)

mRNA.expall <- read.table("mRNA.FDR0.05.exprs.txt",header=T,sep="\t", row.names=1)

mRNA.top <-read.table("mRNA.FDR0.05.exprs.txt",header=T,sep="\t", row.names=1)

# calculate the pearson correlation coefficient

correlation1 <- corr.test(t(circRNA.top),t(mRNA.top),ci=F,adjust="BH")

# output the Cytoscape files

# 5. construct output edge file for cytoscape

node.source <- c()

node.target <- c()

posneg <- c()

for (i in 1:178) {

cross <- intersect(which(abs(correlation1$r[i,])>0.7), which(correlation1$p[i,]<0.05))

for (j in cross) {

node.source <- c(node.source, row.names(circRNA.top)[i])

node.target <- c(node.target, row.names(mRNA.top)[j])

posneg <- c(posneg, ifelse(correlation1$r[i,j]>0,1,0))

}

}

output.edge <- data.frame(source=node.source, target=node.target, state=posneg)

write.table(output.edge, "output_edge.txt", quote=FALSE, sep="\t", row.names=FALSE)

ID <- c()

type <- c()

direction <- c()

fc <- c()

for (i in 1:178) {

ID <- c(ID, as.character(row.names(circRNA.sig)[i]))

type <- c(type, "circRNA")

direction <- c(direction, ifelse(circRNA.sig$logFC[i]>0,"circRNAup","circRNAdown"))

fc <- c(fc, abs(circRNA.sig$logFC[i]))

}

output.node_circ <- data.frame(ID=ID, type=type, direction=direction, foldChange=fc)

ID <- c()

type <- c()

direction <- c() # 1=up, 0=down

fc <- c()

for (j in 1:nrow(mRNA.top)) {

ID <- c(ID, row.names(mRNA.sig)[j])

type <- c(type, "mRNA")

direction <- c(direction, ifelse(mRNA.sig$logFC[j]>0,"mRNAup","mRNAdown"))

fc <- c(fc, abs(mRNA.sig$logFC[j]))

}

output.node_mRNA <- data.frame(ID=ID, type=type, direction=direction, foldChange=fc)

output.node = rbind(output.node_mRNA,output.node_circ)

write.table(output.node, "output_node.txt", quote=FALSE, sep="\t", row.names=FALSE)
